# Supplementary material for: Expression of Arabidopsis SHN1 in Indian Mulberry (Morus indica L.) Increases Leaf Surface Wax Content and Reduces Post-harvest Water Loss
Source: PubMed Central journal article supplement (PMC5378817; doi:10.3389/fpls.2017.00418), 2017-04-04
Supplement: Table_2.pdf [file Table_2.pdf]

**Supplementary Table 2. Silkworm bioassay with *AtSHNI* transgenic as well as wild type plant leaves.**

**A. Weight of 5<sup>th</sup> instar larvae observed during rearing in days.**

|                                 | Weight of 5 <sup>th</sup> instar larvae from day one during rearing (g) |      |      |      |      |      |      |
|---------------------------------|-------------------------------------------------------------------------|------|------|------|------|------|------|
|                                 | 1                                                                       | 2    | 3    | 4    | 5    | 6    | 7    |
| <b>Wild type</b>                | 30.1                                                                    | 35.6 | 42.4 | 48.6 | 54.1 | 61.1 | 67.5 |
| <b><i>AtSHNI</i> transgenic</b> | 30.8                                                                    | 36.2 | 40.8 | 48.2 | 53.6 | 60.4 | 67.6 |

**B. Different parameters such as weight of cocoon, weight of shell, weight of pupa and effective rate of rearing (ERR) was recorded.**

|                                 | Weight of cocoon<br>(g) | Weight of shell<br>(g) | Weight of pupa<br>(g) | ERR<br>(%) |
|---------------------------------|-------------------------|------------------------|-----------------------|------------|
| <b>Wild type</b>                | 1.61                    | 0.505                  | 1.28                  | 91.43      |
| <b><i>AtSHNI</i> transgenic</b> | 1.58                    | 0.515                  | 1.32                  | 92.86      |

The silkworm bioassay experiment was carried out only once.
